# Supplementary material for: The influence of warm-season precipitation on the diel cycle of the surface energy balance and carbon dioxide at a Colorado subalpine forest site
Source: Copernicus journal article supplement (doi:10.5194/bg-12-7349-2015), 2015-12-15

**dDry: Dry Day, Dry Previous Day**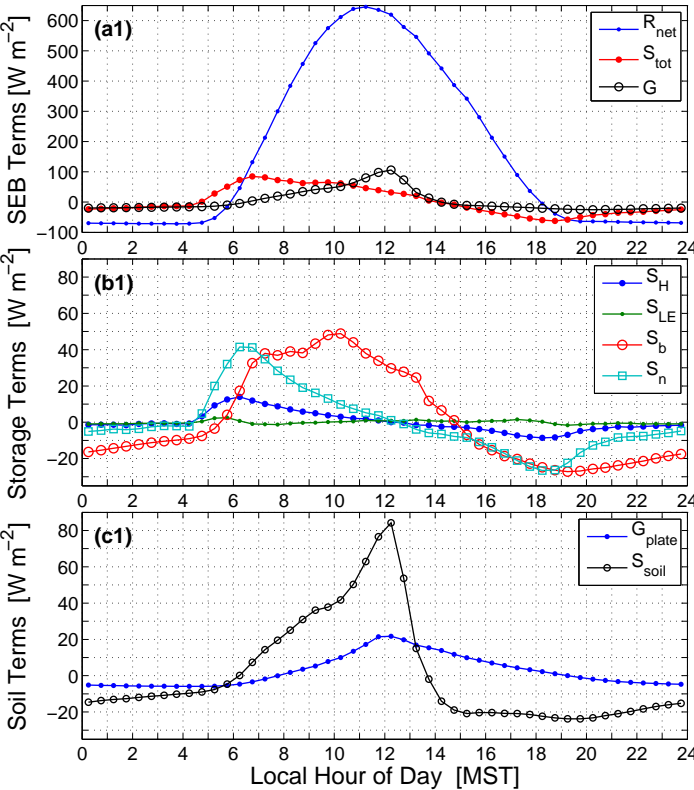**dWet: Wet Day, Dry Previous Day**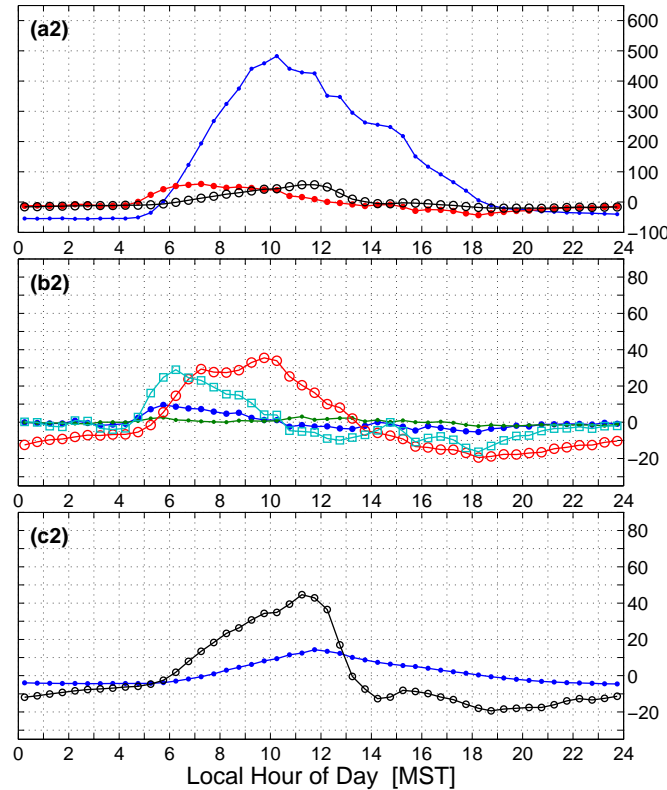**wWet: Wet Day, Wet Previous Day**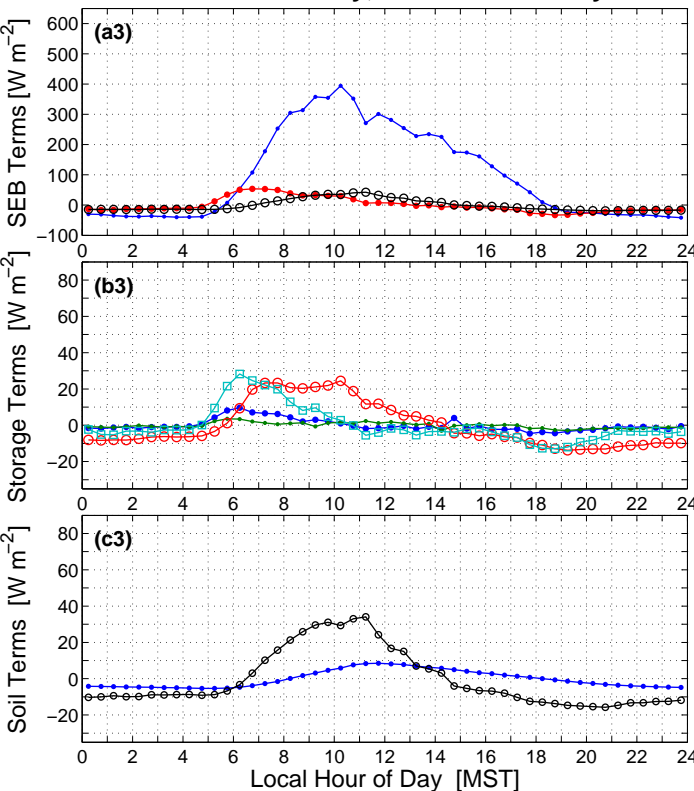**wDry: Dry Day, Wet Previous Day**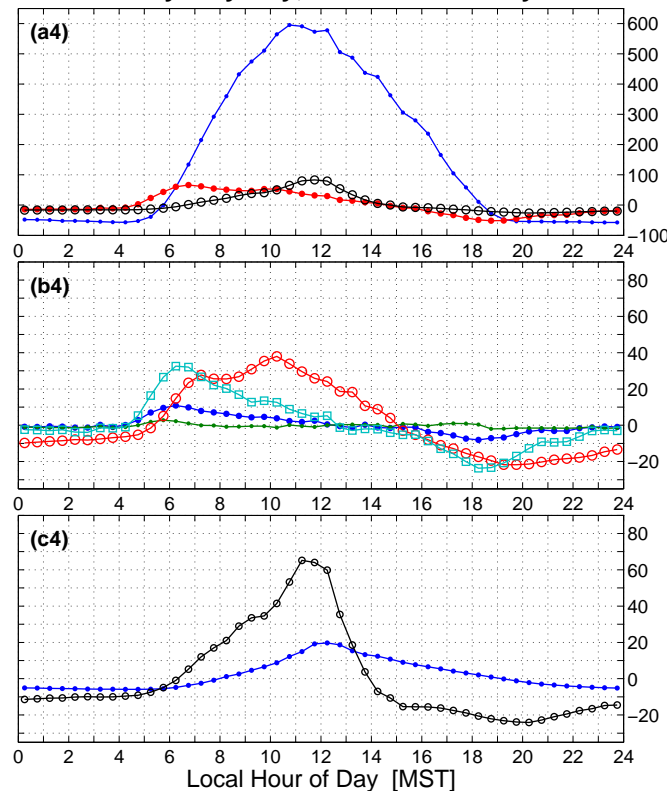

Supplement: Supplementary file 3 [file bg-12-7349-2015-supplement.zip]
