# Supplementary material for: The influence of warm-season precipitation on the diel cycle of the surface energy balance and carbon dioxide at a Colorado subalpine forest site
Source: Copernicus journal article supplement (doi:10.5194/bg-12-7349-2015), 2015-12-15
Supplement: Supplementary file 4 [file bg-12-7349-2015-supplement.zip]

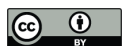

## *Supplement of*

# **The influence of warm-season precipitation on the diel cycle of the surface energy balance and carbon dioxide at a Colorado subalpine forest site**

**S. P. Burns et al.**

*Correspondence to:* S. P. Burns ([sean@ucar.edu](mailto:sean@ucar.edu))

- [bg-12-7349-2015-supplement-title-page.pdf](#)
- [fig\\_supp\\_01.pdf](#)
- [fig\\_supp\\_02.pdf](#)
- [fig\\_supp\\_03.pdf](#)
- [fig\\_supp\\_04.pdf](#)
- [supp\\_figs\\_with\\_captions.pdf](#)

The copyright of individual parts of the supplement might differ from the CC-BY 3.0 licence.
