# Supplementary figures and images for: The influence of warm-season precipitation on the diel cycle of the surface energy balance and carbon dioxide at a Colorado subalpine forest site
Source: Copernicus journal article supplement (doi:10.5194/bg-12-7349-2015), 2015-12-15

(a) With Gap-filled Data

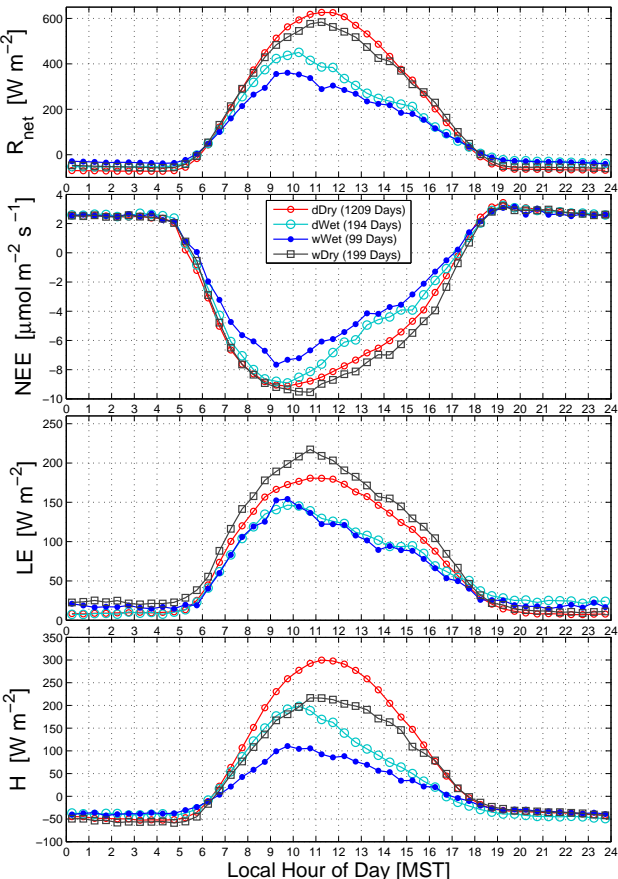

(b) Without Gap-filled Data

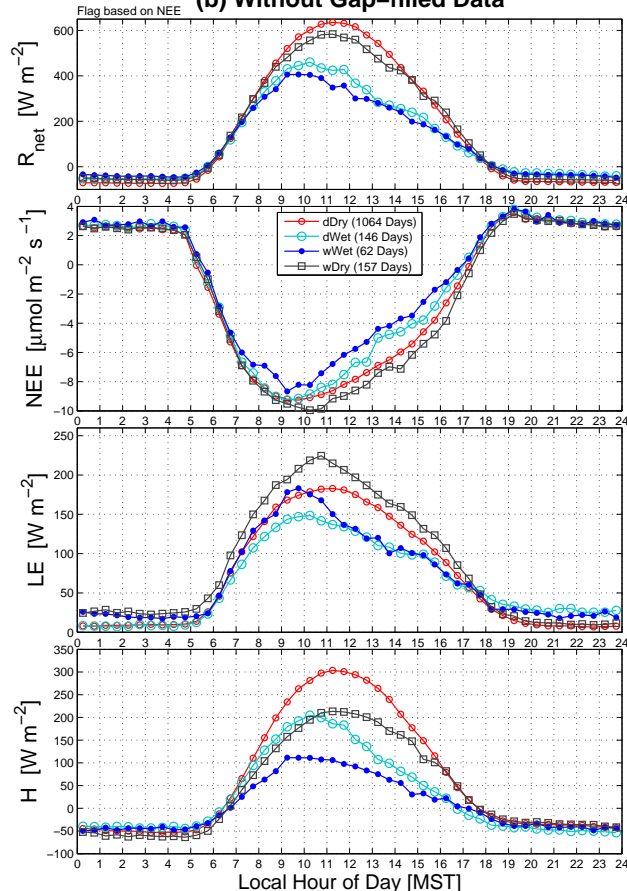

Supplement: Supplementary file 1 [file bg-12-7349-2015-supplement.zip]

Precipitation [mm]

(a) Mean

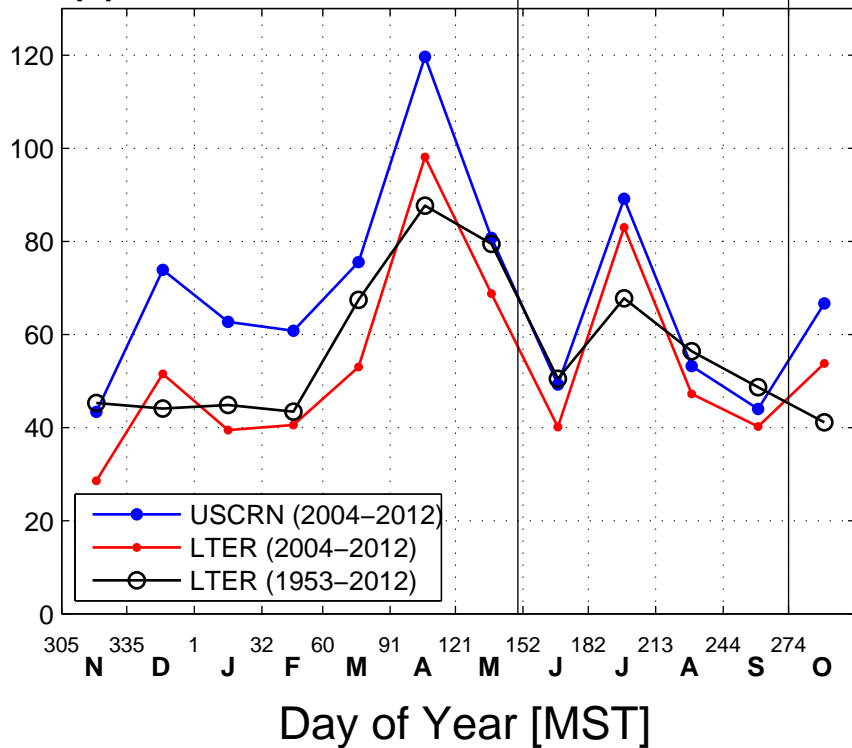

(b) Std Dev.

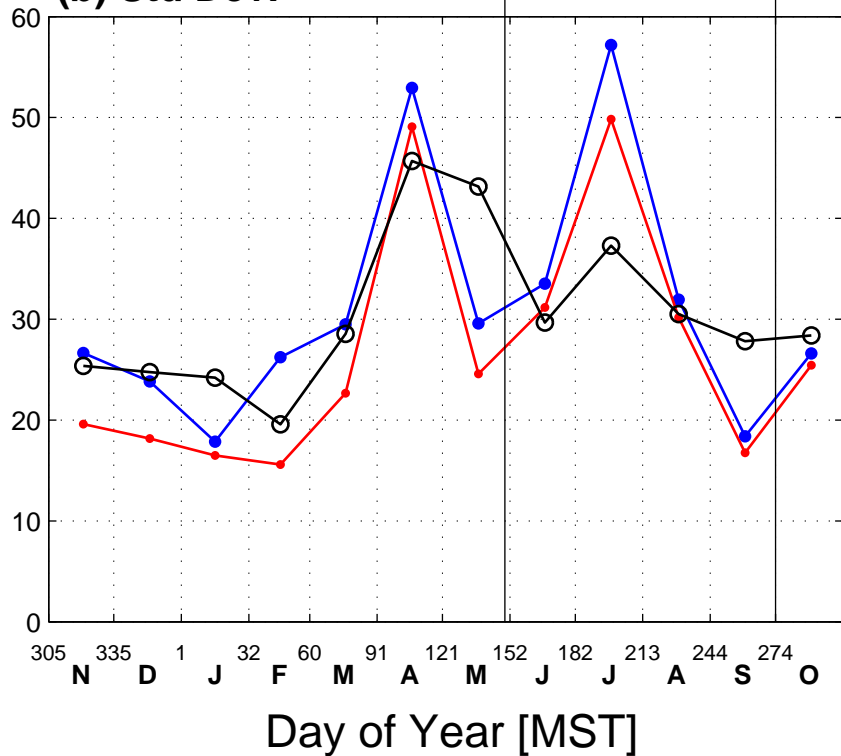

Supplement: Supplementary file 2 [file bg-12-7349-2015-supplement.zip]

2006 06/29 00:00 – 07/12 24:00 MST, DOY= 180.0–194.0

dDry dDry dWet dWet dWet wWet wWet  
5.1 wDry 15.3 wDry dDry dDry 28.6 43.9 11.0 wDry dDry dDry

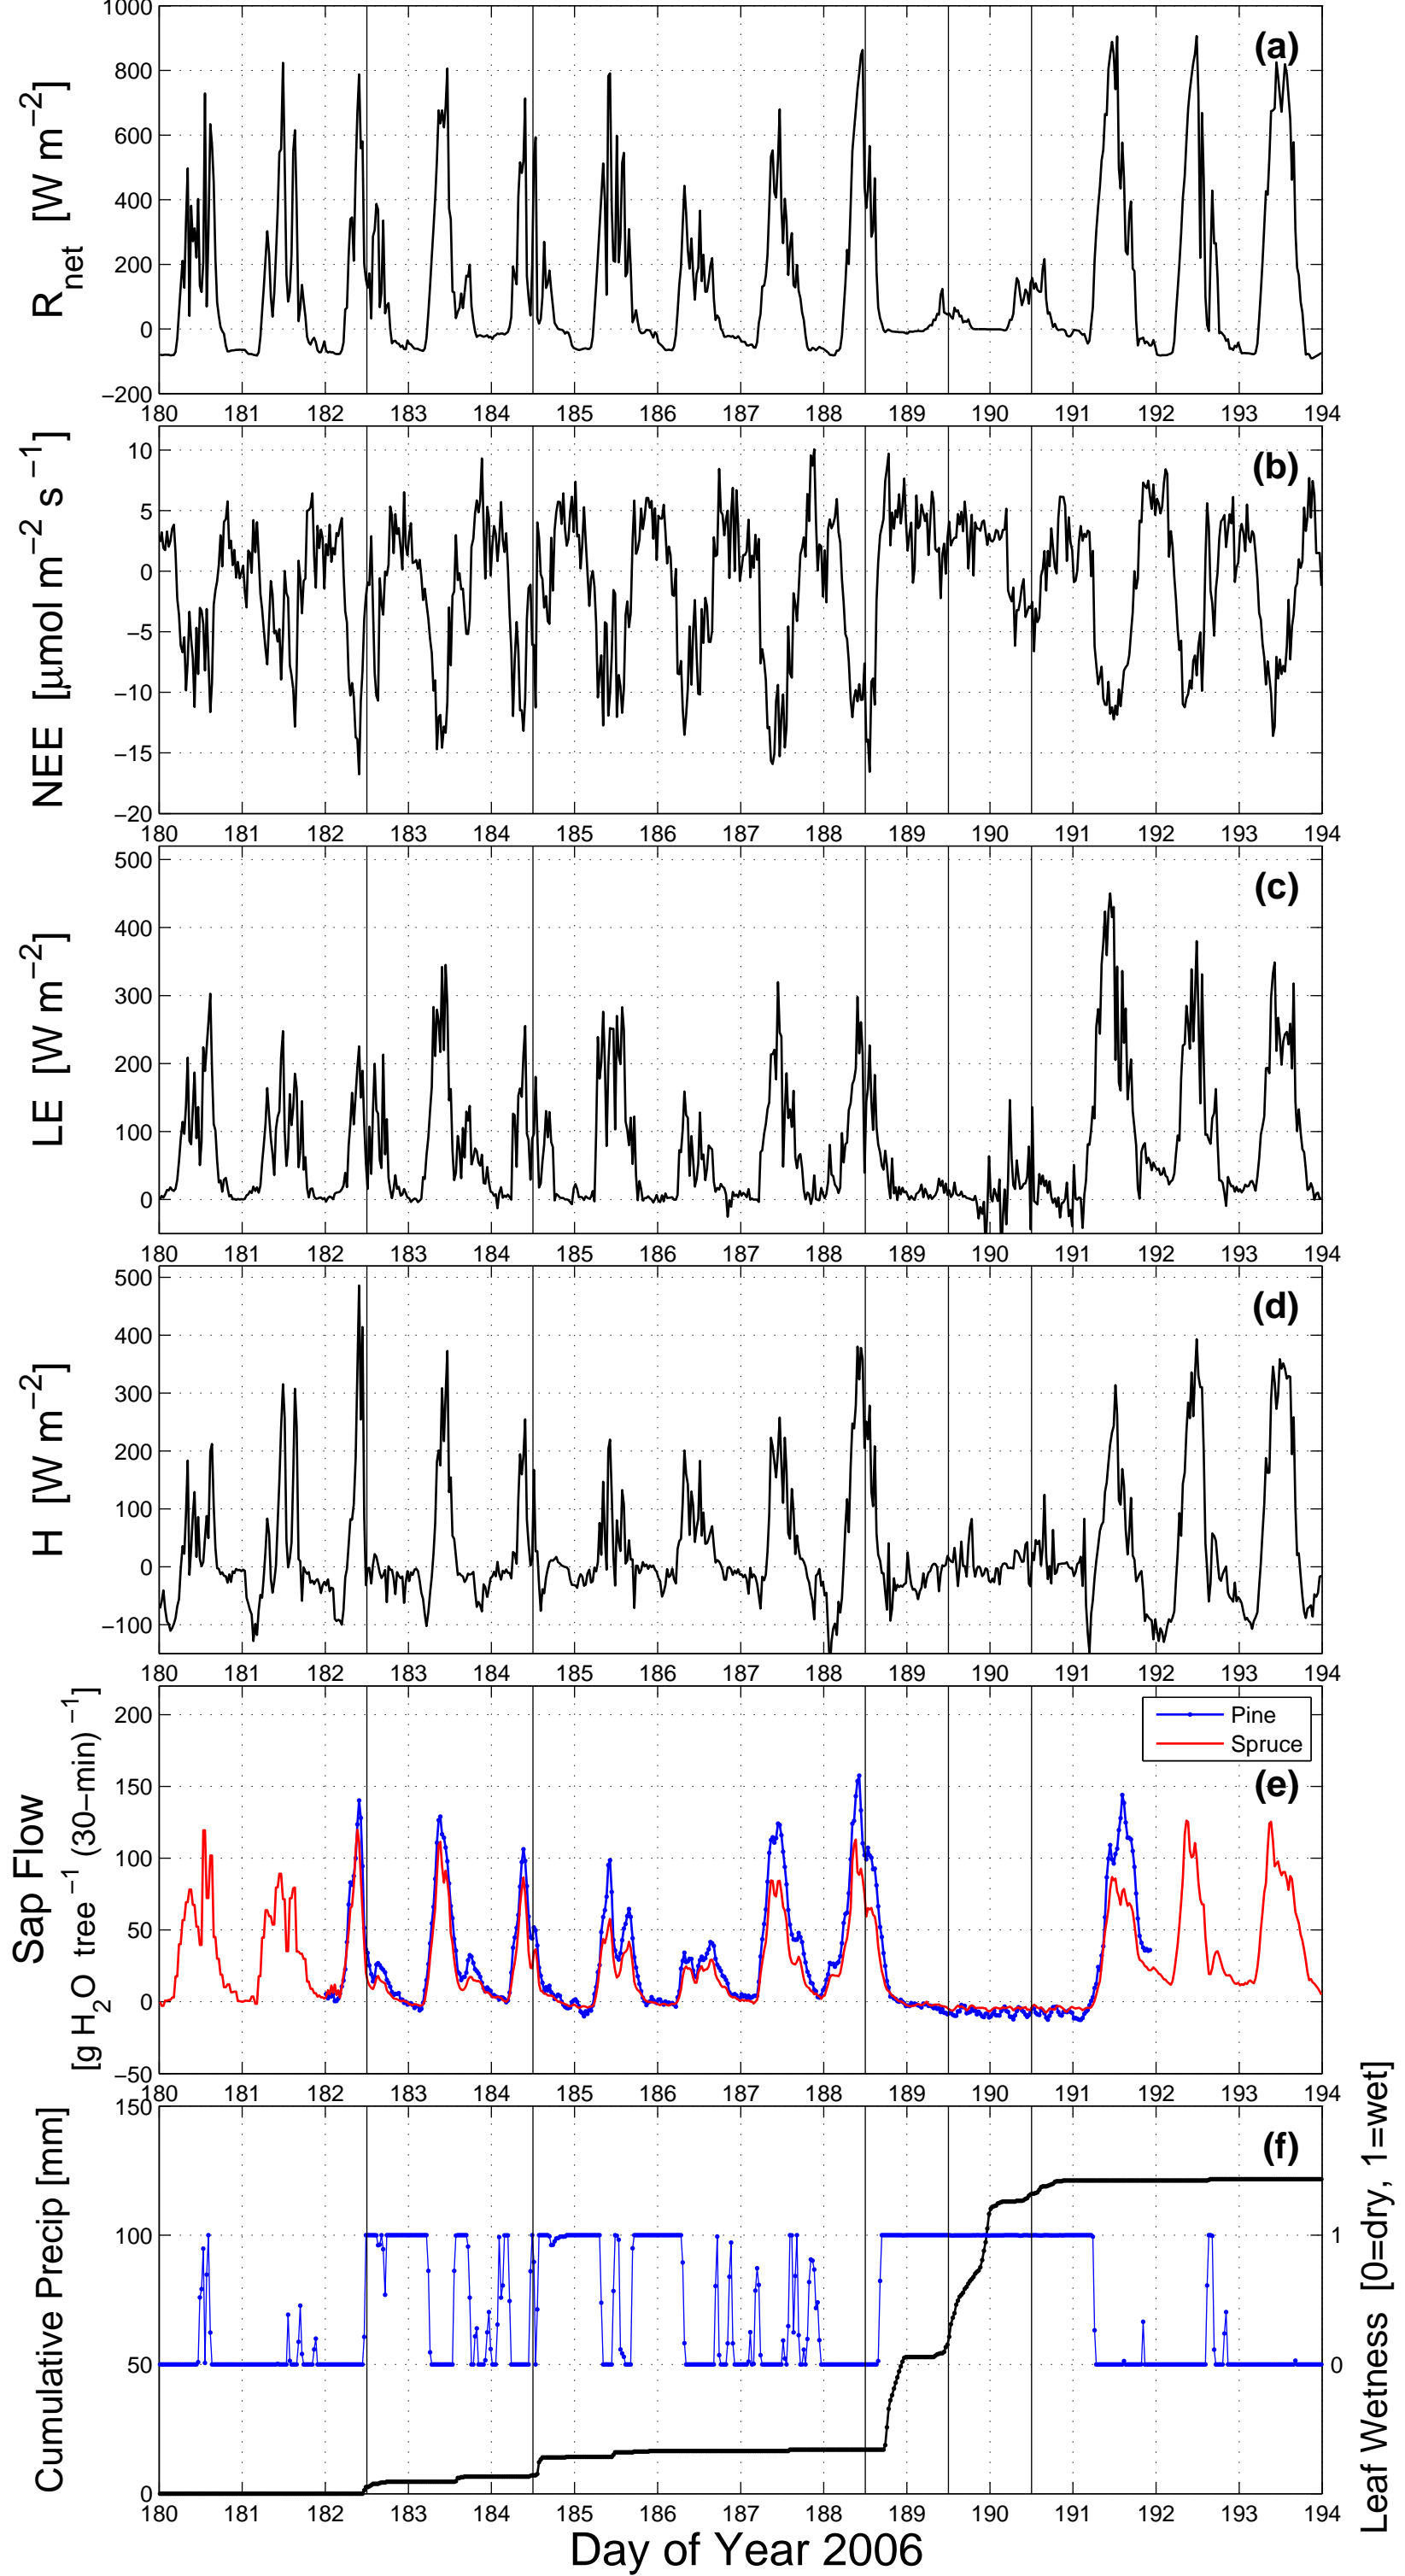

Supplement: Supplementary file 6 [file bg-12-7349-2015-supplement.zip]
